# Supplementary material for: Fat Embolism Syndrome in Sickle Cell Disease
Source: MDPI journal article supplement (doi:10.3390/jcm9113601), 2020-11-08

## Algorithm for early recognition and management of fat embolism syndrome in adult patients with Sickle Cell Disease

Patients at risk for developing FES:

Previous mild disease, infrequent hospital attendance usually HbSC or Hb S $\beta^+$

Check: FBC, reticulocytes, renal function, liver function, **ferritin**, **LDH**, CRP, request blood film and send group and save

### Presenting with pain only

Monitor very closely for

Consider pre-emptive exchange transfusion if

- Sever pain AND
- Ferritin > 20 x baseline AND ONE OF
  - LDH > 20 x baseline
  - Thrombocytopenia or platelets < 50% from baseline
  - Fever

**Discuss immediately with haematology**

### Presentation with any of

- Respiratory failure
- Neurology (altered mental status, focal neurology, coma)
- Other organ dysfunction eg liver, renal, cardiac
- Suggestive labs

**Possible FES**

### Immediate actions

- Inform haematology /ITU
- Haematology to decide emergency exchange transfusion

### **Emergency red cell exchange transfusion (RCE) as soon as FES is suspected**

- if pre-transfusion sickle level (HbS or HbSC) unknown consider it 100%
- Target post transfusion sickle level < 20% (Hb S or HbS&C for HbSC patients)

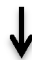

### **Therapeutic plasma exchange (TPE~~X~~)**

- TPE~~X~~ to follow RCE unless complete clinical recovery and improvement in ferritin, LDH and platelets
- Exchange 1 plasma volume/day for 5 days using Octaplas as replacement fluid (alternatively FFP)
- Monitor clinically, ferritin, LDH and platelets
- May need to continue beyond 5 days

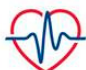

Supplement: s1 [file s1]
